## Index of Authors and Titles

- Abdulkarem, N. *See* Glick, A. B.  
 Adra, C. N. *See* Pravtcheva, D. D.  
 Aguzzi, A. *See* Boulter, C. A.  
 Akhurst, R. J. *See* Millan, F. A.  
 Alberga, A., Boulay, J.-L., Kempe, E., Dennefeld, C. and Haenlin, M. The *snail* gene required for mesoderm formation in *Drosophila* is expressed dynamically in derivatives of all three germ layers 983  
 Anderson, K. V. *See* Hashimoto, C.  
 Andujar, M. B., Couble, P., Couble, M.-L. and Magloire, H. Differential expression of type I and type III collagen genes during tooth development 691  
 Angres, B., Müller, A. H. J., Kellermann, J. and Hausen, P. Differential expression of two cadherins in *Xenopus laevis* 829  
 Arnold, H. *See* Ott, M.-O.  
 Ashhurst, D. E. *See* Wood, A.  
 Atsumi, T. *See* Miwa, Y.  
 Au, P. K. C. *See* Cheah, K. S. E.  
 Ayer-Le Lievre, C., Ståhlbom, P.-A. and Sara, V. R. Expression of IGF-I and -II mRNA in the brain and craniofacial region of the rat fetus 105
- Badgett, M. R. *See* Swalla, B. J.  
 Baker, J. *See* Yasuda, G. K.  
 Bang, A. G., Hartenstein, V. and Posakony, J. W. *Hairless* is required for the development of adult sensory organ precursor cells in *Drosophila* 89  
 Barth, K. S. *See* Conlon, F. L.  
 Bastiani, M. J. *See* Seaver, E. C.  
 Beddington, R. *See* Boulter, C. A.  
 Bernfield, M. *See* Trautman, M. S.  
 Bilbe, G. *See* Schmid, P.  
 Blackman, R. K., Sanicola, M., Raftery, L. A., Gillevet, T. and Gelbart, W. M. An extensive 3' *cis*-regulatory region directs the imaginal disk expression of *decapentaplegic*, a member of the TGF- $\beta$  family in *Drosophila* 667  
 Bloch-Gallego, E., Huchet, M., El M'Hamdi, H., Xie, F.-K., Tanaka, H. and Henderson, C. E. Survival *in vitro* of motoneurons identified or purified by novel antibody-based methods is selectively enhanced by muscle-derived factors 229  
 Bober, E. *See* Ott, M.-O.  
 Bogaert, T. *See* Goh, P.-Y.  
 Boulay, J.-L. *See* Alberga, A.  
 Boulet, A. M., Lloyd, A. and Sakonju, S. Molecular definition of the morphogenetic and regulatory functions and the *cis*-regulatory elements of the *Drosophila Abd-B* homeotic gene 393  
 Boulter, C. A., Aguzzi, A., Williams, R. L., Wagner, E. F., Evans, M. J. and Beddington, R. Expression of *v-src* induces aberrant development and twinning in chimaeric mice 357  
 Brickell, P. M. *See* Rowe, A.  
 Brockes, J. P. *See* Brown, R.  
 Brockes, J. P. *See* Ferretti, P.  
 Bronner-Fraser, M. *See* Ranscht, B.  
 Bronner-Fraser, M. *See* Perris, R.  
 Bronner-Fraser, M. *See* Serbedzija, G. N.  
 Brown, R. *See* Ferretti, P.  
 Brown, R. and Brockes, J. P. Identification and expression of a regeneration-specific homeobox gene in the newt limb blastema 489  
 Buckingham, M. *See* Ott, M.-O.  
 Buckingham, M. E. *See* Lyons, G. E.  
 Buhl, A. E. *See* Kawabe, T. T.  
 Burgan, S. *See* Serbedzija, G. N.  
 Burgoyne, P. S. *See* Palmer, S. J.  
 Byers, M. R. *See* Fisher, C.
- Chambon, P. *See* Ruberte, E.  
 Cheah, K. S. E., Lau, E. T., Au, P. K. C. and Tam, P. P. L. Expression of the mouse  $\alpha 1(\text{II})$  collagen gene is not restricted to cartilage during development 945  
 Chen, Q. *See* Linsenmayer, T. F.  
 Chisholm, A. Control of cell fate in the tail region of *C. elegans* by the gene *egl-5* 921  
 Christian, J. L., McMahon, J. A., McMahon, A. P. and Moon, R. T. *Xwnt-8*, a *Xenopus Wnt-1/int-1*-related gene responsive to mesoderm-inducing growth factors, may play a role in ventral mesodermal patterning during embryogenesis 1045  
 Ciment, G. *See* Stocker, K. M.  
 Condic, M. L., Fristrom, D. and Fristrom, J. W. Apical cell shape changes during *Drosophila* imaginal leg disc elongation: a novel morphogenetic mechanism 23  
 Conlon, F. L., Barth, K. S. and Robertson, E. J. A novel retrovirally induced embryonic lethal mutation in the mouse: assessment of the developmental fate of embryonic stem cells homozygous for the 413.d proviral integration 969  
 Constantini, F. *See* Radice, G.  
 Cooke, J. and Wong, A. Growth-factor-related proteins that are inducers in early amphibian development may mediate similar steps in amniote (bird) embryogenesis 197  
 Cooke, P. S. *See* Cunha, G. R.  
 Copeland, N. G. *See* Perkins, A. S.  
 Corbett, A. *See* Wood, A.  
 Couble, M.-L. *See* Andujar, M. B.  
 Couble, P. *See* Andujar, M. B.  
 Cox, D. *See* Schmid, P.  
 Crouch, M. L. *See* Fernandez, D. E.  
 Cunha, G. R., Young, P., Higgins, S. J. and Cooke, P. S. Neonatal seminal vesicle mesenchyme induces a new morphological and functional phenotype in the epithelia of adult ureter and ductus deferens 145
- Dagle, J. M. *See* Weeks, D. L.  
 Dahlin, K. J. *See* Nishiyama, A.  
 Dambly-Chaudière, C. *See* Huang, F.  
 Danilchik, M. V. and Denegre, J. M. Deep cytoplasmic rearrangements during early development in *Xenopus laevis* 845  
 Davis, C. A., Holmyard, D. P., Millen, K. J. and Joyner, A. L. Examining pattern formation in mouse, chicken and frog embryos with an *En*-specific antiserum 287  
 de la Torre, J. R. *See* Hemmati-Brivanlou, A.  
 de Pomerai, D. I., Ip, W. K., McLaughlin, M. and Perry, K. C. Expression in non-lens tissues of an enzyme activity related to the 'lens-specific' protein,  $\delta$  crystallin 181  
 Denegre, J. M. *See* Danilchik, M.  
 Denhez, F. *See* Millan, F. A.  
 Dennefeld, C. *See* Alberga, A.  
 Desbiens, X., Quéva, C., Jaffredo, T., Stéhelin, D. and Vandenbunder, B. The relationship between cell proliferation and the transcription of the nuclear oncogenes *c-myc*, *c-myb* and *c-ets-1* during feather morphogenesis in the chick embryo 699

- DeSimone, D. *See* Ginsberg, D.  
 Dionne, C. *See* Moore, J. W.  
 Dollé, P. *See* Ruberte, E.  
 Domingo, C. *See* Perris, R.  
 Drysdale, T. A. and Elinson, R. P. Development of the *Xenopus laevis* hatching gland and its relationship to surface ectoderm patterning 469  
 Dudley, K. *See* Mazarakis, N. D.  
 Dudley, M. and Poethig, R. S. The effect of a heterochronic mutation, *Teopod2*, on the cell lineage of the maize shoot 733  
 Dütting, D. *See* Schlosshauer, B.
- Eager, N. S. C. *See* Rowe, A.  
 Edwards, Y. H. *See* Lyons, G. E.  
 Eichele, G. *See* Smith, S. M.  
 El M'Hamdi, H. *See* Bloch-Gallego, E.  
 Eldon, E. D. and Pirrotta, V. Interactions of the *Drosophila* gap gene *giant* with maternal and zygotic pattern-forming genes 367  
 Elinson, R. P. *See* Drysdale, T. A.  
 Eriksson, U. *See* Maden, M.  
 Evans, E. P. *See* Mazarakis, N. D.  
 Evans, M. J. *See* Boulter, C. A.
- Ferguson, M. W. J. *See* Mackenzie, A.  
 Fernandez, D. E., Turner, F. R. and Crouch, M. L. *In situ* localization of storage protein mRNAs in developing meristems of *Brassica napus* embryos 299  
 Ferretti, P., Brockes, J. P. and Brown, R. A new type II keratin restricted to normal and regeneration limbs and tails is responsive to retinoic acid 497  
 Fisher, C., Byers, M. R., Iadarola, M. J. and Powers, E. A. Patterns of epithelial expression of Fos protein suggest important role in the transition from viable to cornified cell during keratinization 253  
 Flamme, I., Schulze-Osthoff, K. and Jacob, H. J. Mitogenic activity of chicken chorioallantoic fluid is temporally correlated to vascular growth in the chorioallantoic membrane and related to fibroblast growth factors 683  
 Flanders, K. C. *See* Glick, A. B.  
 Flenniken, A. M. *See* Kawabe, T. T.  
 Frank, E. and Sanes, J. R. Lineage of neurons and glia in chick dorsal root ganglia: analysis *in vivo* with a recombinant retrovirus 895  
 Frankel, J. *See* Shi, X.  
 Fraser, S. E. *See* Serbedzija, G. N.  
 Freemont, P. *See* Mazarakis, N. D.  
 Fristrom, D. *See* Condic, M. L.  
 Fristrom, J. W. *See* Condic, M. L.
- Geiger, B. *See* Ginsberg, D.  
 Gelbart, W. M. *See* Blackman, R. K.  
 Gershon, M. D. *See* Pomeranz, H. D.  
 Gerttula, S. *See* Hashimoto, C.  
 Ghysen, A. *See* Huang, F.  
 Gibney, E. *See* Linsenmayer, T. F.  
 Gillevet, T. *See* Blackman, R. K.  
 Ginsberg, D., DeSimone, D. and Geiger, B. Expression of a novel cadherin (EP-cadherin) in unfertilized eggs and early *Xenopus* embryos 315  
 Glick, A. B., McCune, B. K., Abdulkarem, N., Flanders, K. C., Lumadue, J. A., Smith, J. M. and Sporn, M. B. Complex regulation of TGF  $\beta$  expression by retinoic acid in the vitamin A-deficient rat 1081  
 Godsave, S. F. and Slack, J. M. W. Single cell analysis of mesoderm formation in the *Xenopus* embryo 523
- Goh, P.-Y. and Bogaert, T. Positioning and maintenance of embryonic body wall muscle attachments in *C. elegans* requires the *mup-1* gene 667  
 Gordon, M. K. *See* Linsenmayer, T. F.  
 Goris, J. *See* Jessus, C.  
 Grauer, D. *See* Schlosshauer, B.  
 Groppi, V. E. *See* Kawabe, T. T.  
 Gumbiner, B. *See* Levi, G.  
 Gurdon, J. B. *See* Hopwood, N. D.
- Haccard, O. *See* Jessus, C.  
 Haenlin, M. *See* Alberga, A.  
 Hamada, T. *See* Sasaki, H.  
 Hardy, R. and Reynolds, R. Proliferation and differentiation potential of rat forebrain oligodendroglial progenitors both *in vitro* and *in vivo* 1061  
 Harland, R. M. *See* Hemmati-Brivanlou, A.  
 Hartenstein, V. *See* Bang, A. G.  
 Harvey, M. B. and Kaye, P. L. IGF-2 receptors are first expressed at the 2-cell stage of mouse development 1057  
 Hashimoto, C., Gerttula, S. and Anderson, K. V. Plasma membrane localization of the Toll protein in the syncytial *Drosophila* embryo: importance of transmembrane signaling for dorsal-ventral pattern formation 1021  
 Hatanaka, K. and Okada, M. Retarded nuclear migration in *Drosophila* embryos with aberrant F-actin reorganization caused by maternal mutations and by cytochalasin treatment 909  
 Hausen, P. *See* Angres, B.  
 He, W. *See* Shi, X.  
 Helfand, S. L. *See* Irvine, K. D.  
 Hemmati-Brivanlou, A., de la Torre, J. R., Holt, C. and Harland, R. M. Cephalic expression and molecular characterization of *Xenopus En-2* 715  
 Henderson, C. E. *See* Bloch-Gallego, E.  
 Hertzberg, E. L. *See* Minkoff, R.  
 Higashinakagawa, T. *See* Sasaki, H.  
 Higgins, S. J. *See* Cunha, G. R.  
 Hill, R. E. *See* Murphy, P.  
 Hogan, B. L. M. *See* Jones, C. M.  
 Hogness, D. S. *See* Irvine, K. D.  
 Holmyard, D. P. *See* Davis, C. A.  
 Holt, C. *See* Hemmati-Brivanlou, A.  
 Hopwood, N. D., Pluck, A. and Gurdon, J. B. *Xenopus* Myf-5 marks early muscle cells and can activate muscle genes ectopically in early embryos 551  
 Hornbruch, A. and Wolpert, L. The spatial and temporal distribution of polarizing activity in the flank of the pre-limb-bud stages in the chick embryo 725  
 Huang, F., Dambly-Chaudière, C. and Ghysen, A. The emergence of sense organs in the wing disc of *Drosophila* 1087  
 Huchet, M. *See* Bloch-Gallego, E.  
 Hunt, P. *See* Maden, M.  
 Hunt, P. A. Survival of XO mouse fetuses: effect of parental origin of the X chromosome or uterine environment? 1137
- Iadarola, M. J. *See* Fisher, C.  
 Ikawa, Y. *See* Miwa, Y.  
 Imai, N. *See* Miwa, Y.  
 Ip, W. K. *See* de Pomerai, D. I.  
 Irvine, K. D., Helfand, S. L. and Hogness, D. S. The large upstream control region of the *Drosophila* homeotic gene *Ultrabithorax* 407  
 Ish-Horowitz, D. *See* Parkhurst, S. M.
- Jacob, H. J. *See* Flamme, I.

- Jaffredo, T.** See Desbiens, X.  
**Jaye, M.** See Moore, J. W.  
**Jeffery, W. R.** See Swalla, B. J.  
**Jenkins, N. A.** See Perkins, A. S.  
**Jermyn, K. A. and Williams, J. G.** An analysis of culmination in *Dictyostelium* using prestalk and stalk-specific cell autonomous markers 779  
**Jesus, C., Rime, H., Haccard, O., van Lint, J., Goris, J., Merlevede, W. and Ozon, R.** Tyrosine phosphorylation of p34<sup>cdc2</sup> and p42 during meiotic maturation of *Xenopus* oocyte. Antagonistic action of okadaic acid and 6-DMAP 813  
**Johnson, E. M.** See Wanaka, A.  
**Jones, C. M., Lyons, K. M. and Hogan, B. L. M.** Involvement of *Bone Morphogenetic Protein-4* (BMP-4) and *Vgr-1* in morphogenesis and neurogenesis in the mouse 531  
**Jones, R.** Interaction of zona pellucida glycoproteins, sulphated carbohydrates and synthetic polymers with proacrosin, the putative egg-binding protein from mammalian spermatozoa 1155  
**Jowett, A. K.** See Mackenzie, A.  
**Joyner, A. L.** See Davis, C. A.
- Karlstrom, R. O.** See Seaver, E. C.  
**Kawabe, T. T., Rea, T. J., Flenniken, A. M., Williams, B. R. G., Groppi, V. E. and Buhl, A. E.** Localization of TIMP in cycling mouse hair 877  
**Kaye, P. L.** See Harvey, M. B.  
**Keller, G.** See Wiles, M. V.  
**Kellermann, J.** See Angres, B.  
**Kelso-Winemiller, L. C. and Winkler, M. M.** 'Unmasking' of stored maternal mRNAs and the activation of protein synthesis at fertilization in sea urchins 623  
**Kempe, E.** See Alberga, A.  
**Kiehart, D. P.** See Young, P. E.  
**Kimelman, J.** See Trautman, M. S.  
**Knust, E.** See Thomas, U.  
**Kondaiah, P.** See Millan, F. A.  
**Kraut, R. and Levine, M.** Spatial regulation of the gap gene *giant* during *Drosophila* development 601  
**Kraut, R. and Levine, M.** Mutually repressive interactions between the gap genes *giant* and *Krüppel* define middle body regions of the *Drosophila* embryo 611  
**Krotoski, D.** See Perris, R.  
**Krumlauf, R.** See Maden, M.  
**Kubiak, J., Paldi, A., Weber, M. and Maro, B.** Genetically identical parthenogenetic mouse embryos produced by inhibition of the first meiotic cleavage with cytochalasin D 763  
**Kuroiwa, A.** See Maden, M.
- Lallier, T.** See Perris, R.  
**Lau, E. T.** See Cheah, K. S. E.  
**Lee, J. J.** See Radice, G.  
**Leeming, G. L.** See Mackenzie, A.  
**Levi, G., Gumbiner, B. and Thiery, J. P.** The distribution of E-cadherin during *Xenopus laevis* development 159  
**Levine, M.** See Kraut, R.  
**Linsenmayer, T. F., Chen, Q., Gibney, E., Gordon, M. K., Marchant, J. K., Mayne, R. and Schmid, T. M.** Collagen types IX and X in the developing chick tibiotarsus: analyses of mRNAs and proteins 191  
**Lloyd, A.** See Boulet, A. M.  
**Lu, L.** See Shi, X.  
**Lumadue, J. A.** See Glick, A. B.  
**Lyon, M. F.** See Mazarakis, N. D.  
**Lyons, G.** See Ott, M.-O.  
**Lyons, G. E., Buckingham, M. E., Tweedie, S. and Edwards, Y. H.** Carbonic anhydrase III, an early mesodermal marker, is expressed in embryonic mouse skeletal muscle and notochord 241  
**Lyons, G. E., Buckingham, M. E. and Mannherz, H. G.**  $\alpha$ -actin proteins and gene transcripts are colocalized in embryonic mouse muscle 451  
**Lyons, K. M.** See Jones, C. M.
- Mackenzie, A., Leeming, G. L., Jowett, A. K., Ferguson, M. W. J. and Sharpe, P. T.** The homeobox gene *Hox 7.1* has specific regional and temporal expression patterns during early murine craniofacial embryogenesis, especially tooth development *in vivo* and *in vitro* 269  
**Maden, M., Hunt, P., Eriksson, U., Kuroiwa, A., Krumlauf, R. and Summerbell, D.** Retinoic acid-binding protein, rhombomeres and the neural crest 35  
**Magloire, H.** See Andujar, M. B.  
**Maier, R.** See Schmid, P.  
**Makabe, K. W.** See Saiga, H.  
**Mannherz, H. G.** See Lyons, G. E.  
**Marchant, J. K.** See Linsenmayer, T. F.  
**Maro, B.** See Kubiak, J.  
**Mayne, R.** See Linsenmayer, T. F.  
**Mazarakis, N. D., Nelki, D., Lyon, M. F., Ruddy, S., Evans, E. P., Freemont, P. and Dudley, K.** Isolation and characterisation of a testis-expressed developmentally regulated gene from the distal inversion of the mouse *t*-complex 561  
**McCune, B. K.** See Glick, A. B.  
**McLaughlin, M.** See de Pomerai, D. I.  
**McMahon, A. P.** See Christian, J. L.  
**McMahon, J. A.** See Christian, J. L.  
**McMaster, G. K.** See Schmid, P.  
**Mercer, J. A.** See Perkins, A. S.  
**Merlevede, W.** See Jesus, C.  
**Milbrandt, J.** See Wanaka, A.  
**Millan, F. A., Denhez, F., Kondaiah, P. and Akhurst, R. J.** Embryonic gene expression patterns of TGF  $\beta$ 1,  $\beta$ 2 and  $\beta$ 3 suggest different developmental functions *in vivo* 131  
**Millen, K. J.** See Davis, C. A.  
**Minkoff, R., Parker, S. B. and Hertzberg, E. L.** Analysis of distribution patterns of gap junctions during development of embryonic chick facial primordia and brain 509  
**Mita, T.** See Saiga, H.  
**Miwa, Y., Atsumi, T., Imai, N. and Ikawa, Y.** Primitive erythropoiesis of mouse teratocarcinoma stem cells PCC3/A/1 in serum-free medium 543  
**Mizokami, A.** See Saiga, H.  
**Moon, R. T.** See Christian, J. L.  
**Moor, R. M.** See Sun, F. Z.  
**Moore, J. W., Dionne, C., Jaye, M. and Swain, J. L.** The mRNAs encoding acidic FGF, basic FGF, and FGF receptor are coordinately downregulated during myogenic differentiation 741  
**Morriss-Kay, G.** See Ruberte, E.  
**Müller, A. H. J.** See Angres, B.  
**Murphy, P. and Hill, R. E.** Expression of the mouse *labial*-like homeobox-containing genes, *Hox 2.9* and *Hox 1.6*, during segmentation of the hindbrain 61  
**Nelki, D.** See Mazarakis, N. D.  
**Nishiyama, A., Dahlin, K. J. and Stallcup, W. B.** The expression of NG2 proteoglycan in the developing rat limb 933  
**Noden, D. M.** Origins and patterning of avian outflow tract endocardium 867

- Nogawa, H. *See* Takahashi, Y.
- Okada, M. *See* Hatanaka, K.
- Ott, M.-O., Bober, E., Lyons, G., Arnold, H. and Buckingham, M. Early expression of the myogenic regulatory gene, *myf-5*, in precursor cells of skeletal muscle in the mouse embryo 1097
- Ozon, R. *See* Jessus, C.
- Paldi, A. *See* Kubiak, J.
- Palmer, S. J. and Burgoyne, P. S. XY follicle cells in the ovaries of XO/XY and XO/XY/XYY mosaic mice 1017
- Parker, S. B. *See* Minkoff, R.
- Parkhurst, S. M. and Ish-Horowicz, D. Mis-regulating segmentation gene expression in *Drosophila* 1121
- Patel, H. *See* Urch, U. A.
- Peifer, M., Rauskolb, C., Williams, M., Riggleman, B. and Wieschaus, E. The segment polarity gene *armadillo* interacts with the *wingless* signaling pathway in both embryonic and adult pattern formation 1029
- Perkins, A. S., Mercer, J. A., Jenkins, N. A. and Copeland, N. G. Patterns of *Evi-1* expression in embryonic and adult tissues suggest that *Evi-1* plays an important regulatory role in the mouse development 479
- Perris, R., Krotoski, D., Lallier, T., Domingo, C., Sorrell, J. M. and Bronner-Fraser, M. Spatial and temporal changes in the distribution of proteoglycans during avian neural crest development 583
- Perry, K. C. *See* de Pomerai, D. I.
- Pesacreta, T. C. *See* Young, P. E.
- Pirrota, V. *See* Eldon, E. D.
- Pluck, A. *See* Hopwood, N. D.
- Poethig, R. S. *See* Dudley, M.
- Pomeranz, H. D., Rothman, T. P. and Gershon, M. D. Colonization of the post-umbilical bowel by cells derived from the sacral neural crest: direct tracing of cell migration using an intercalating probe and a replication-deficient retrovirus 647
- Posakony, J. W. *See* Bang, A. G.
- Powers, E. A. *See* Fisher, C.
- Pravtcheva, D. D., Adra, C. N. and Ruddle, F. H. Timing of paternal *Pgk-1* expression in embryos of transgenic mice 1109
- Prokop, A. and Technau, G. M. The origin of postembryonic neuroblasts in the ventral nerve cord of *Drosophila melanogaster* 79
- Qiu, Z. *See* Shi, X.
- Quéva, C. *See* Desbiens, X.
- Radice, G., Lee, J. J. and Constantini, F. H $\beta$ 58, an insertional mutation affecting early postimplantation development of the mouse embryo 801
- Raftery, L. A. *See* Blackman, R. K.
- Ramirez, F. *See* Su, M.-W.
- Ranscht, B. and Bronner-Fraser, M. T-cadherin expression alternates with migrating neural crest cells in the trunk of the avian embryo 15
- Rauskolb, C. *See* Peifer, M.
- Rea, T. J. *See* Kawabe, T. T.
- Rees, S. *See* Stocker, K. M.
- Reynolds, R. *See* Hardy, R.
- Richman, J. M. *See* Rowe, A.
- Riggleman, B. *See* Peifer, M.
- Rime, H. *See* Jessus, C.
- Risau, W. *See* Schnurch, H.
- Robertson, E. J. *See* Conlon, F. L.
- Rothman, T. P. *See* Pomeranz, H. D.
- Rowe, A., Eager, N. S. C. and Brickell, P. M. A member of the RXR nuclear receptor family is expressed in neural-crest-derived cells of the developing chick peripheral nervous system 771
- Rowe, A., Richman, J. M. and Brickell, P. M. Retinoic acid treatment alters the distribution of retinoic acid receptor-B transcripts in the embryonic chick face 1007
- Ruberte, E., Dollé, P., Chambon, P. and Morriss-Kay, G. Retinoic acid receptors and cellular retinoid binding proteins. II. Their differential pattern of transcription during early morphogenesis in mouse embryos 45
- Ruddle, F. H. *See* Pravtcheva, D. D.
- Ruddy, S. *See* Mazarakis, N. D.
- Saiga, H., Mizokami, A., Makabe, K. W., Satoh, N. and Mita, T. Molecular cloning and expression of a novel homeobox gene AHox1 of the ascidian, *Halocynthia roretzi* 821
- Sakaki, Y. *See* Sasaki, H.
- Sakonju, S. *See* Boulet, A. M.
- Sánchez-Herrero, E. Control of the expression of the bithorax complex genes abdominal-A and Abdominal-B by *cis*-regulatory regions in *Drosophila* embryos 437
- Sanes, J. R. *See* Frank, E.
- Sanicola, M. *See* Blackman, R. K.
- Sara, V. R. *See* Ayer-Le Lievre, C.
- Sasaki, H., Hamada, T., Ueda, T., Seki, R., Higashinakagawa, T. and Sakaki, Y. Inherited type of allelic methylation variations in a mouse chromosome region where an integrated transgene shows methylation imprinting 573
- Satoh, N. *See* Saiga, H.
- Schlosshauer, B., Grauer, D., Dütting, D. and Vanselow, J. Expression of a novel Müller glia specific antigen during development and after optic nerve lesion 789
- Schmid, P., Cox, D., Bilbe, G., Maier, R. and McMaster, G. K. Differential expression of TGF  $\beta$ 1,  $\beta$ 2 and  $\beta$ 3 genes during mouse embryogenesis 117
- Schmid, T. M. *See* Linsenmayer, T. F.
- Schnürch, H. and Risau, W. Differentiating and mature neurons express the acidic fibroblast growth factor gene during chick neural development 1143
- Schubiger, G. *See* Yasuda, G. K.
- Schulze-Osthoff, K. *See* Flamme, I.
- Seaver, E. C., Karlstrom, R. O. and Bastiani, M. J. The restricted spatial and temporal expression of a nervous-system-specific antigen involved in axon outgrowth during development of the grasshopper 881
- Seki, R. *See* Sasaki, H.
- Serbedzija, G. N., Burgan, S., Fraser, S. E. and Bronner-Fraser, M. Vital dye labelling demonstrates a sacral neural crest contribution to the enteric nervous system of chick and mouse embryos 857
- Sharpe, P. T. *See* Mackenzie, A.
- Sherman, L. *See* Stocker, K. M.
- Shi, X., Lu, L., Qiu, Z., He, W. and Frankel, J. Microsurgically generated discontinuities provoke heritable changes in cellular handedness of a ciliate, *Stylonychia mytilus* 337
- Slack, J. M. W. *See* Godsave, S. F.
- Smith, J. M. *See* Glick, A. B.
- Smith, S. M. and Eichele, G. Temporal and regional differences in the expression pattern of distinct retinoic acid receptor- $\beta$  transcripts in the chick embryo 253
- Sobis, H., Verstuyf, A. and Vandeputte, M. Endodermal origin of yolk-sac-derived teratomas 75

- Solursh, M.** See Su, M.-W.
- Sorrell, J. M.** See Ferris, R.
- Speicher, S. A.** See Thomas, U.
- Sporn, M. B.** See Glick, A. B.
- Ståhlbom, P.-A.** See Ayer-Le Lievre, C.
- Stallcup, W. B.** See Nishiyama, A.
- Stéhelin, D.** See Desbiens, X.
- Stocker, K. M., Sherman, L., Rees, S. and Ciment, G.** Basic FGF and TGF- $\beta$ 1 influence commitment to melanogenesis in neural crest-derived cells of avian embryos 635
- Su, M.-W., Suzuki, H. R., Solursh, M. and Ramirez, F.** Progressively restricted expression of a new homeobox-containing gene during *Xenopus laevis* embryogenesis 1179
- Summerbell, D.** See Maden, M.
- Sun, F. Z. and Moor, R. M.** Nuclear-cytoplasmic interactions during ovine oocyte maturation 171
- Suzuki, H. R.** See Su, M.-W.
- Swain, J. L.** See Moore, J. W.
- Swalla, B. J., Badgett, M. R. and Jeffery, W. R.** Identification of a cytoskeletal protein localized in the myoplasm of ascidian eggs: localization is modified during anural development 425
- Takahashi, Y. and Nogawa, H.** Branching morphogenesis of mouse salivary epithelium in basement membrane-like substratum separated from mesenchyme by the membrane filter 327
- Tam, P. P. L.** See Cheah, K. S. E.
- Tanaka, H.** See Bloch-Gallego, E.
- Technau, G. M.** See Prokop, A.
- Thiery, J. P.** See Levi, G.
- Thomas, U., Speicher, S. A. and Knust, E.** The *Drosophila* gene *Serrate* encodes an EGF-like transmembrane protein with a complex expression pattern in embryos and wing discs 749
- Thorogood, P.** See Wood, A.
- Torrence, S. A.** Positional cues governing cell migration in leech neurogenesis 993
- Trautman, M. S., Kimelman, J. and Bernfield, M.** Developmental expression of syndecan, an integral membrane proteoglycan, correlates with cell differentiation 213
- Turner, F. R.** See Fernandez, D. E.
- Tweedie, S.** See Lyons, G. E.
- Ueda, T.** See Sasaki, H.
- Urch, U. A. and Patel, H.** The interaction of boar sperm proacrosin with its natural substrate, the zona pellucida, and with polysulfated polysaccharides 1165
- van Lint, J.** See Jesus, C.
- Vandenbunder, B.** See Desbiens, X.
- Vandeputte, M.** See Sobis, H.
- Vanselow, J.** See Schlosshauer, B.
- Verstuyf, A.** See Sobis, H.
- Wagner, E. F.** See Boulter, C. A.
- Walder, J. A.** See Weeks, D. L.
- Wanaka, A., Milbrandt, J. and Johnson, E. M.** Expression of FGF receptor gene in rat development 455
- Weber, M.** See Kubiak, J.
- Weeks, D. L., Walder, J. A. and Dagle, J. M.** Cyclin B mRNA depletion only transiently inhibits the *Xenopus* embryonic cell cycle 1173
- Wieschaus, E.** See Peifer, M.
- Wiles, M. V. and Keller, G.** Multiple hematopoietic lineages develop from embryonic stem (ES) cells in culture 259
- Williams, B. R. G.** See Kawabe, T. T.
- Williams, J. G.** See Jermyn, K. A.
- Williams, M.** See Peifer, M.
- Williams, R. L.** See Boulter, C. A.
- Winkler, M. M.** See Kelso-Winemiller, L. C.
- Wolpert, L.** See Hornbruch, A.
- Wong, A.** See Cooke, J.
- Wood, A., Ashhurst, D. E., Corbett, A. and Thorogood, P.** The transient expression of type II collagen at tissue interfaces during mammalian craniofacial development 955
- Xie, F.-K.** See Bloch-Gallego, E.
- Yasuda, G. K., Baker, J. and Schubiger, G.** Independent roles of centrosomes and DNA in organizing the *Drosophila* cytoskeleton 379
- Young, P. E., Pesacreta, T. C. and Kiehart, D. P.** Dynamic changes in the distribution of cytoplasmic myosin during *Drosophila* embryogenesis 1
- Young, P.** See Cunha, G. R.
